# Supplementary material for: Nanocellulose–organic montmorillonite nanocomposite adsorbent for diuron removal from aqueous solution: optimization using response surface methodology
Source: Royal Society of Chemistry journal article supplement (doi:10.1039/d0ra04853d), 2020-01-01
Supplement: d0ra04853d1.pdf [file d0ra04853d1.pdf]

## Supporting information

### **General Procedure for recycling of adsorbent:**

The 1g saturated adsorbent was soaked in 30 ml anhydrous ethanol solvent and allowed to stir 12 h at room temperature, then washed with fresh anhydrous ethanol for three times, and the adsorbed DUR was washed out from the adsorbent. Finally, the regenerated solid adsorbent was centrifuged and dried at 60°C for 2 h.

Fig. S1. SEM image of NM

Fig. S2. C1s, and O1s high-resolution XPS spectra of the NM, CTM, CNC, CNC/CTM, and DUR-CNC/CTM samples

Fig. S3. Predicted (-) vs. observed values (■)

Fig. S4. (a) Diuron adsorption isotherms; Langmuir, Freundlich, and Sips isothermal models at temperatures (b) 288 K, (c) 298 K, and (d) 305 K

Table S1. Experimental independent variables and their coding levels

Table S2. Specific surface areas and pore structure parameters of the nanocomposite adsorbents

Table S3. Experimental and predicted values of the response surface center combination design and response

Table S4. ANOVA for the response surface quadratic model for the removal of diuron

Table S5. Kinetic parameters of the adsorption of diuron by the CNC/CTM nanocomposite

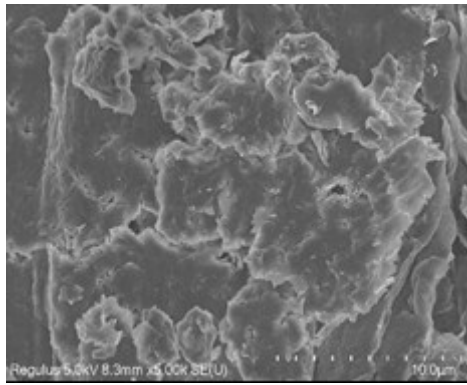

Fig. S1. SEM image of NM

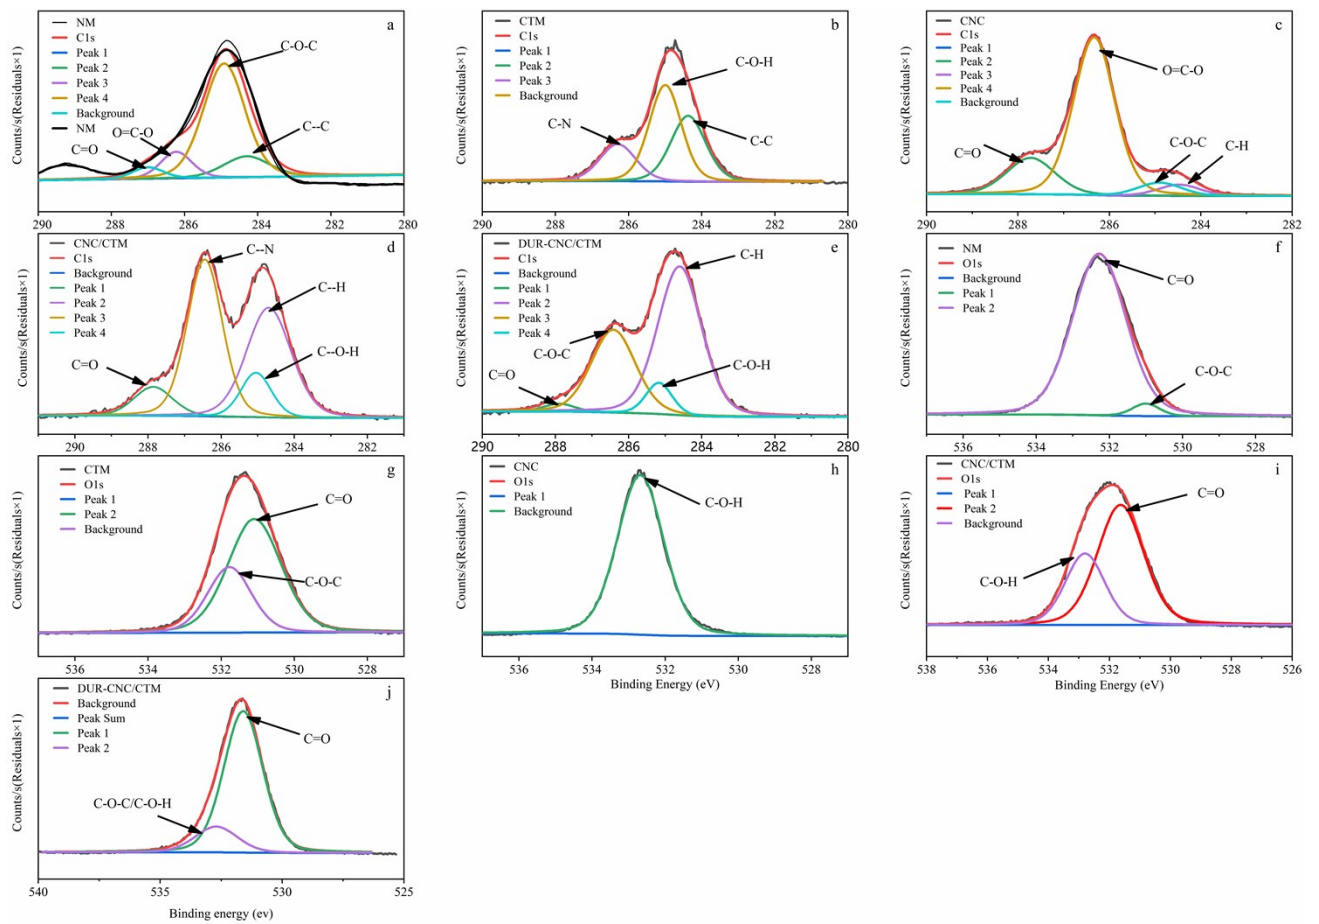

Fig. S2. C1s, and O1s high-resolution XPS spectra of the NM, CTM, CNC, CNC/CTM, and DUR-CNC/CTM samples

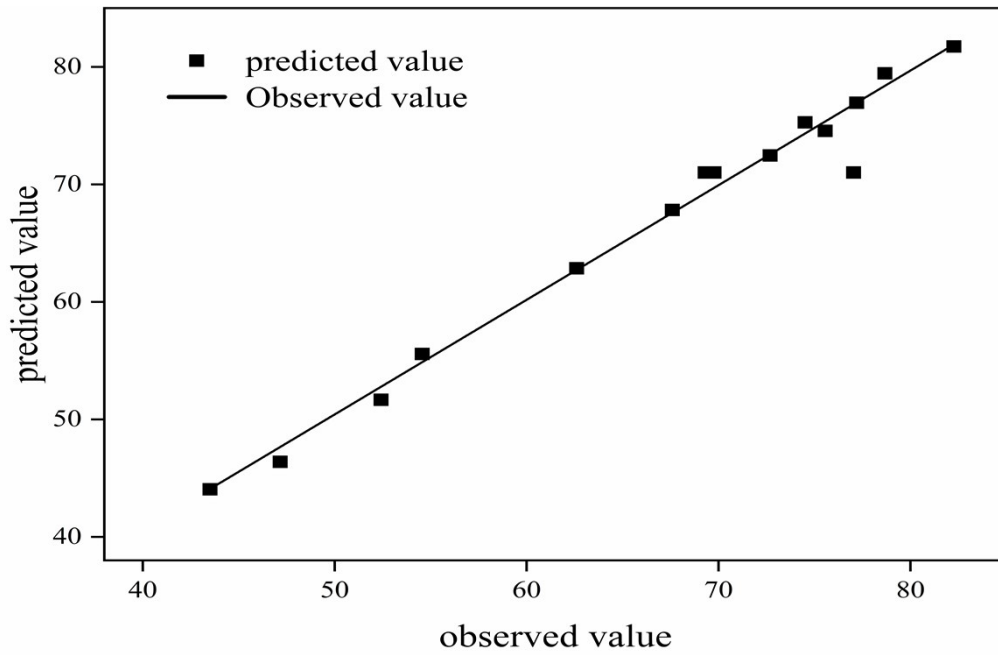

Fig. S3. Predicted (-) vs. observed values (■)

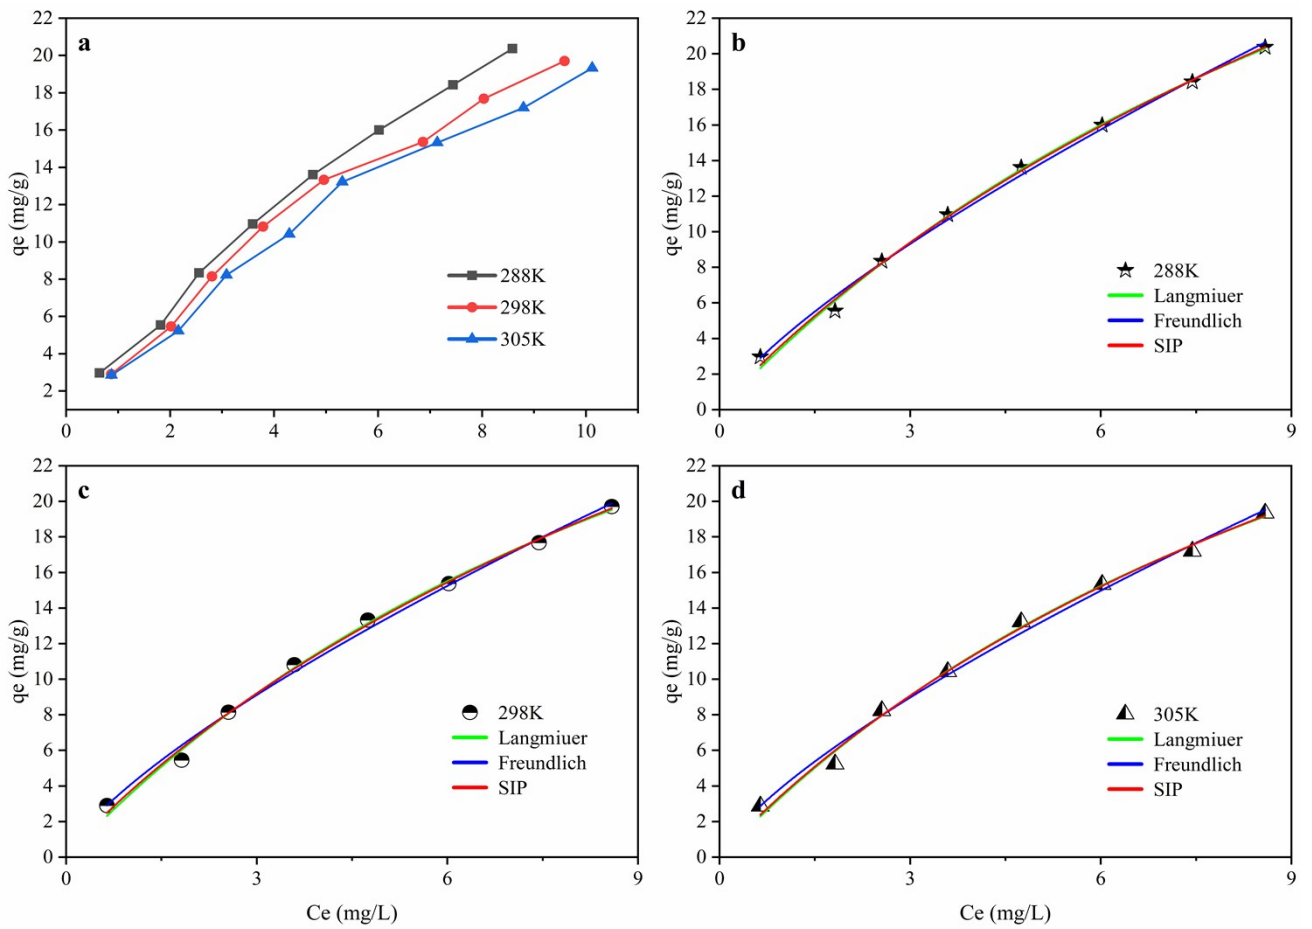

Fig. S4. (a) Diuron adsorption isotherms; Langmuir, Freundlich, and Sips isothermal models at temperatures (b) 288 K, (c) 298 K, and (d) 305 K

Table S1. Experimental independent variables and their coding levels

| Variable                                  | Coding         | Code value |      |       |
|-------------------------------------------|----------------|------------|------|-------|
|                                           |                | -1         | 0    | 1     |
| Dosage of adsorbent (mg L <sup>-1</sup> ) | X <sub>1</sub> | 0.025      | 0.05 | 0.075 |
| Reaction time (min)                       | X <sub>2</sub> | 190        | 270  | 350   |
| Pollutant concentration (mg/L)            | X <sub>3</sub> | 5          | 20   | 35    |

Table S2. Specific surface areas and pore structure parameters of the nanocomposite adsorbents

| Sample      | BET Surface Area (m <sup>2</sup> g <sup>-1</sup> ) | Total pore value (cm <sup>3</sup> g <sup>-1</sup> ) | Average pore diameter | Median pore width (nm) |
|-------------|----------------------------------------------------|-----------------------------------------------------|-----------------------|------------------------|
| CTM         | 13.7927                                            | 0.0852                                              | 28.6090               | 1.0447                 |
| CNC         | 27.2370                                            | 0.0434                                              | 6.3750                | 1.0420                 |
| CNC/CTM     | 39.5160                                            | 0.1224                                              | 12.3909               | 1.0305                 |
| DUR-CNC/CTM | 22.5311                                            | 0.0520                                              | 9.2343                | 1.3822                 |

Table S3. Experimental and predicted values of the response surface center combination design and response

| Experiment number | X <sub>1</sub> | X <sub>2</sub> | X <sub>3</sub> | Removal rate (%)   |                  |
|-------------------|----------------|----------------|----------------|--------------------|------------------|
|                   |                |                |                | Experimental value | Predictive value |
| 1                 | 0              | 1              | 1              | 78.67              | 79.45            |
| 2                 | 1              | -1             | 0              | 43.51              | 44.04            |
| 3                 | -1             | 0              | 1              | 72.69              | 72.46            |
| 4                 | 0              | -1             | 1              | 74.51              | 75.27            |
| 5                 | 1              | 1              | 0              | 67.59              | 67.82            |
| 6                 | 0              | 0              | 0              | 69.56              | 71.00            |
| 7                 | 0              | 1              | -1             | 75.56              | 74.55            |
| 8                 | 0              | -1             | -1             | 69.30              | 71.00            |
| 9                 | -1             | 1              | 0              | 77.04              | 71.00            |
| 10                | 0              | 0              | 0              | 82.26              | 81.73            |
| 11                | 1              | 0              | -1             | 52.42              | 51.66            |
| 12                | -1             | -1             | 0              | 77.20              | 76.95            |
| 13                | 0              | 0              | 0              | 69.77              | 71.00            |
| 14                | 0              | 0              | 0              | 47.16              | 46.38            |
| 15                | 1              | 0              | 1              | 62.61              | 62.86            |
| 16                | -1             | 0              | -1             | 54.56              | 55.57            |
| 17                | 0              | 0              | 0              | 69.34              | 71.00            |

Table S4. ANOVA for the response surface quadratic model for the removal of diuron

| Source                            | Sum of Squares | df | Mean      | F Value    | p-value Prob > F |                        |
|-----------------------------------|----------------|----|-----------|------------|------------------|------------------------|
| <b>Model</b>                      | 2041.06        | 9  | 226.78    | 31.18      | <0.0001          | <b>significant</b>     |
| <b>X<sub>1</sub></b>              | 175.22         | 1  | 175.22    | 24.09      | 0.0017           |                        |
| <b>X<sub>2</sub></b>              | 1606.03        | 1  | 1606.03   | 220.81     | <0.0001          |                        |
| <b>X<sub>3</sub></b>              | 44.70          | 1  | 44.70     | 6.15       | 0.0423           |                        |
| <b>X<sub>1</sub>X<sub>2</sub></b> | 4.73           | 1  | 4.73      | 0.65       | 0.9330           |                        |
| <b>X<sub>1</sub>X<sub>3</sub></b> | 0.055          | 1  | 0.055     | 7.593E-003 | 0.8442           |                        |
| <b>X<sub>2</sub>X<sub>3</sub></b> | 0.30           | 1  | 0.30      | 0.042      | 0.9424           |                        |
| <b>X<sub>1</sub><sup>2</sup></b>  | 0.041          | 1  | 0.041     | 5.617E-003 | 0.0012           |                        |
| <b>X<sub>2</sub><sup>2</sup></b>  | 202.27         | 1  | 202.27    | 27.81      | 0.5241           |                        |
| <b>X<sub>3</sub><sup>2</sup></b>  | 3.27           | 1  | 3.27      | 0.45       |                  |                        |
| <b>Residual</b>                   | 50.91          | 7  | 7.27      |            | 0.9234           | <b>not significant</b> |
| <b>Lack of Fit</b>                | 5.20           | 3  | 1.73      | 0.15       |                  |                        |
| <b>Pure Error</b>                 | 45.71          | 4  | 11.43     |            |                  |                        |
| <b>Cor Total</b>                  | 2091.97        | 16 | Cor Total |            |                  |                        |

$$R^2 = 0.9757; R_{adj}^2 = 0.9444$$

Table S5. Kinetic parameters of the adsorption of diuron by the CNC/CTM nanocomposite

| Concentration (mg L <sup>-1</sup> ) | q <sub>e</sub> (mg g <sup>-1</sup> ) <sub>exp</sub> | Pseudo-first-order                  |                                      |                |                | Pseudo-second-order                                    |                                      |                |                |
|-------------------------------------|-----------------------------------------------------|-------------------------------------|--------------------------------------|----------------|----------------|--------------------------------------------------------|--------------------------------------|----------------|----------------|
|                                     |                                                     | K <sub>1</sub> (min <sup>-1</sup> ) | q <sub>e</sub> (mg g <sup>-1</sup> ) | R <sup>2</sup> | X <sup>2</sup> | K <sub>2</sub> (g mg <sup>-1</sup> min <sup>-1</sup> ) | q <sub>e</sub> (mg g <sup>-1</sup> ) | R <sup>2</sup> | X <sup>2</sup> |
| 5                                   | 2.97                                                | 0.0571                              | 2.83+0.05                            | 0.961          | 0.022          | 0.0348                                                 | 2.99+0.02                            | 0.997          | 0.001          |
| 10                                  | 5.23                                                | 0.0403                              | 4.92+0.16                            | 0.910          | 0.168          | 0.0084                                                 | 5.35+0.10                            | 0.975          | 0.047          |
| 15                                  | 8.23                                                | 0.0269                              | 7.64+0.19                            | 0.928          | 0.303          | 0.0077                                                 | 8.24+0.09                            | 0.989          | 0.049          |
| 20                                  | 10.96                                               | 0.0267                              | 10.39+0.23                           | 0.961          | 0.335          | 0.0036                                                 | 11.37+0.08                           | 0.997          | 0.025          |
| 30                                  | 15.32                                               | 0.0206                              | 14.26+0.44                           | 0.945          | 0.940          | 0.0017                                                 | 15.93+0.24                           | 0.989          | 0.184          |
| 40                                  | 20.37                                               | 0.0201                              | 19.49+0.36                           | 0.983          | 0.580          | 0.0011                                                 | 22.02+0.25                           | 0.995          | 0.178          |
